## Articles of interest in other COB journals

From *Journal of Cell Science*

### **The nuclear periphery of embryonic stem cells is a transcriptionally permissive and repressive compartment**

Li Luo, Katherine L. Gassman, Lydia M. Petell, Christian L. Wilson, Joerg Bewersdorf and Lindsay S. Shopland

Luo, L. et al. 2009. *J. Cell Sci.* doi:10.1242/jcs.052555

### **Kinase-activity-independent functions of atypical protein kinase C in *Drosophila***

Soya Kim, Ieva Gailite, Bernard Moussian, Stefan Luschnig, Maik Goette, Karen Fricke, Mona Honemann-Capito, Helmut Grubmüller and Andreas Wodarz

Kim, S. et al. 2009. *J. Cell Sci.* doi:10.1242/jcs.052514
